# Supplementary material for: Linear trends of temperature, salinity, and oxygen in the North Pacific based on GOBAI-O 2 over 2 decades and their controlling factors
Source: Copernicus journal article supplement (doi:10.5194/egusphere-2025-2746), 2025-07-28
Supplement: Supplementary file 1 [file egusphere-2025-2746-supplement.pdf]

## **Supporting Information for "Linear trends of temperature, salinity, and oxygen in the North Pacific based on GOBAI-O<sub>2</sub> over 2 decades and their controlling factors"**

### **Authors:**

Miho Ishizu<sup>1, 2</sup>, Tomomichi Ogata<sup>3</sup>

<sup>1</sup>Center for Climate Physics, Institute for Basic Science, Busan 46241, Republic of Korea

<sup>2</sup>Pusan National University, Tonghapgyegyegwan Bldg 2 Busandaehak-ro, 63 beon-gil, Geumjeong-gu, Busan 46241, Republic of Korea

<sup>3</sup>Japan Agency for Marine-Earth Science and Technology, Environmental Variability Prediction and Application Research Group, Yokohama Institute for Earth Sciences, 3173-25 Showa-machi, Kanagawa-ku, Yokohama 236-0001, Japan

### **Contents of this file:**

**Figure S1.** Uncertainty estimates of dissolved oxygen concentration ( $\mu\text{mol/kg}$ ) along the isopycnal surface of 25.0 (a), 26.0 (b), and  $26.8\sigma_\theta$  (c). The uncertainty data is based on GOBAI-O<sub>2</sub> data [ Sharp et al. 2023 ].

**Figure S2.** Coefficient of determination for linear regression lines along the isopycnal surface of 25.0 (a), 26.0 (b), and  $26.8\sigma_\theta$  (c).

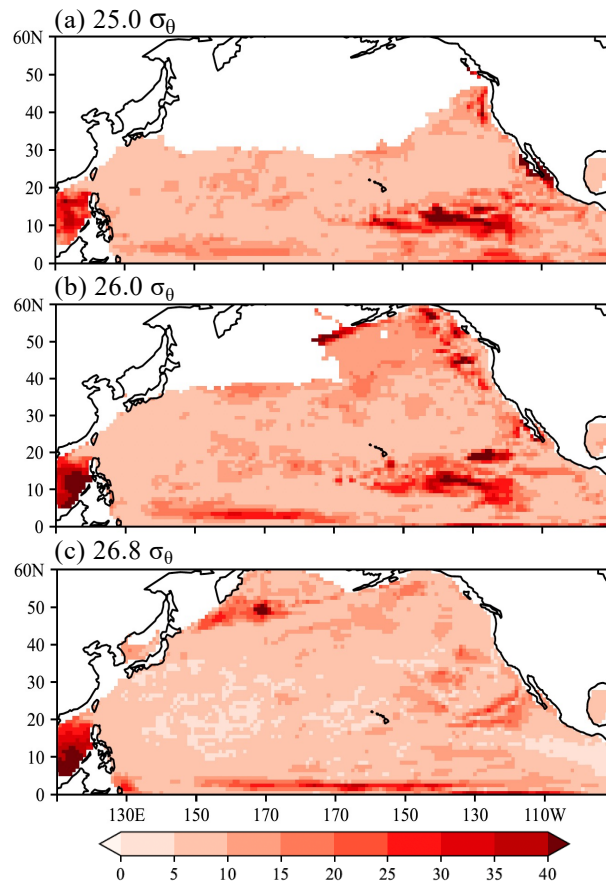

Figure S1. Uncertainty estimates of dissolved oxygen concentration ( $\mu\text{mol/kg}$ ) along the isopycnal surface of  $25.0$  (a),  $26.0$  (b), and  $26.8\sigma_\theta$  (c). The uncertainty data is based on GOBAI- $\text{O}_2$  data [ Sharp et al. 2023 ].

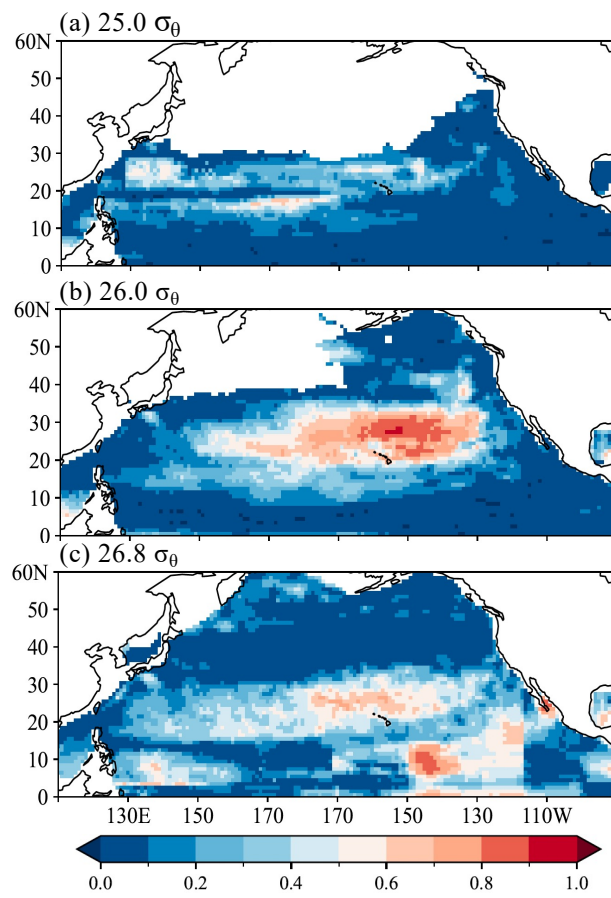

Figure S2. Coefficient of determination for linear regression lines along the isopycnal surface of 25.0 (a), 26.0 (b), and 26.8 $\sigma_\theta$  (c).
